# Supplementary material for: Last interglacial sea levels within the Gulf of Mexico and northwestern Caribbean Sea
Source: Copernicus journal article supplement (doi:10.5194/essd-13-1419-2021), 2021-04-01
Supplement: Supplementary file 1 [file essd-13-1419-2021-supplement.zip]

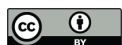

*Supplement of*

## **Last interglacial sea levels within the Gulf of Mexico and northwestern Caribbean Sea**

**Alexander R. Simms**

*Correspondence to:* Alexander R. Simms ([asimms@geol.ucsb.edu](mailto:asimms@geol.ucsb.edu))

- [essd-13-1419-2021-supplement-title-page.pdf](#)
- [Last interglacial sea-level proxies from the Gulf of Mexico and northwestern Caribbean Sea2.xlsx](#)

The copyright of individual parts of the supplement might differ from the article licence.
