# Supplementary material for: Last interglacial sea levels within the Gulf of Mexico and northwestern Caribbean Sea
Source: Copernicus journal article supplement (doi:10.5194/essd-13-1419-2021), 2021-04-01
Supplement: Supplementary file 1 [file Last interglacial sea-level proxies from the Gulf of Mexico and northwestern Carribean Sea2.xlsx]

## Sheet: README
WALIS spreadsheet
This file was exported from WALIS on 22 02 2021
The data in this file were compiled in WALIS, the World Atlas of Last Interglacial Shorelines. WALIS is a product of the ERC project WARMCOASTS (ERC-StG-802414). Bugs and suggestions for improvements can be sent to arovere@marum.de
The sheets in this file contain the following information (if available): - Summary RSL from stratigraphy: RSL datapoints from stratigraphic records and associated dated samples. Rows with common RSL ID (but different ages available) are highlighted with alternating gray and white colors. - RSL from single coral: RSL datapoints from dated corals, for which paleo water depth is estimated - RSL pro…
Information on each field can be found at: https://walis-help.readthedocs.io/en/latest/ Information on WALIS (Including data download can be found at: https://warmcoasts.eu/world-atlas.html
Suggested acknowledgments: The data used in this study were [extracted from / compiled in] WALIS, a sea-level database interface developed by the ERC Starting Grant WARMCOASTS (ERC-StG-802414), in collaboration with PALSEA (PAGES / INQUA) working group. The database structure was designed by A. Rovere, D. Ryan, T. Lorscheid, A. Dutton, P. Chutcharavan, D. Brill, N. Jankowski, D. Mueller, M. Bartz…

## Sheet: Summary RSL from stratigraphy
WALIS RSL ID	Latitude	Longitude	Site	Subsite	Nation	Region	Type of datapoint	RSL Indicator	RSL indicator description	Elevation measurement technique	Elevation (m)	Elevation error (m)	RWL	IR	Vertical datum	Paleo RSL (m)	Paleo RSL uncertainty (m)	Dating technique	Timing constraint	Originally reported ID	Analysis ID	Material_type	Reported age (ka)	Reported age uncertainty (ka)	U-Series recalculated age (ka)	U-Series recalculate age uncertainty (ka)	U-Series corrected age (speleothems, ka)	U-Series corrected age uncertainty (speleothems, ka)	Stratigraphy Upper Age (ka)	Stratigraphy Lower Age (ka)	MIS limit	Marine Isotopic Stage	Quality of RSL information	Quality of age information	Reference(s)	Record Created by	Last Update
448	18.1244	-87.8305	Ambergis Cay, Belize Reef Point	Reef Point	Belize	Corozal	Sea Level Indicator	Shallow water coral reef facies	Barrier Reef/reef-flat	Not reported	0.5	1	-0.15	0.3	Mean Sea Level / General definition	0.65	1.01	U-Series	Equal to	KW-90	MA06-001-001	Coral	135.8	0.9							0		3	3	Mazzullo, 2006	Alexander Simms	2021-02-20 00:37:55
448	18.1244	-87.8305	Ambergis Cay, Belize Reef Point	Reef Point	Belize	Corozal	Sea Level Indicator	Shallow water coral reef facies	Barrier Reef/reef-flat	Not reported	0.5	1	-0.15	0.3	Mean Sea Level / General definition	0.65	1.01	AAR	Equal to	KW-30A	MA006-002-001	The gastropod: Strombus gigas.									Equal to	= MIS 5e	3	3	Mazzullo, 2006	Alexander Simms	2021-02-20 00:37:55
448	18.1244	-87.8305	Ambergis Cay, Belize Reef Point	Reef Point	Belize	Corozal	Sea Level Indicator	Shallow water coral reef facies	Barrier Reef/reef-flat	Not reported	0.5	1	-0.15	0.3	Mean Sea Level / General definition	0.65	1.01	AAR	Equal to	KW-30B-1	MA006-003-001	The gastropod: Strombus gigas.									Equal to	= MIS 5e	3	3	Mazzullo, 2006	Alexander Simms	2021-02-20 00:37:55
450	16.2781	-86.5937	Roatan, Honduras Interior Fossil Coral Reef	Interior Fossil Coral Reef	Honduras	Islas de la Bahia	Sea Level Indicator	Coral reef terrace (general definition)		Not reported	37.2	0.15	-8.65	16.7	Mean Sea Level / General definition	45.85	8.35	ESR	Equal to	Interior fossil reef	CO08-001-001		138.9	27.8							Equal to	= MIS 5e	1	2	Cox et al., 2008	Alexander Simms	2020-06-17 17:39:10
438	21.0928	-86.8657	Cancun, Mexico		Mexico	Quintana Roo	Sea Level Indicator	Beach deposit or beachrock	They are using the elevation of the beach stratification within the beach ridge deposits	Not reported	4.8	1	-1	2.8	Not reported	5.8	1.72	U-Series	Equal to	355-11	SZ78-001-001	Coral	121	6									2	3	Szabo et al., 1978	Alexander Simms	2021-02-20 02:13:15
438	21.0928	-86.8657	Cancun, Mexico		Mexico	Quintana Roo	Sea Level Indicator	Beach deposit or beachrock	They are using the elevation of the beach stratification within the beach ridge deposits	Not reported	4.8	1	-1	2.8	Not reported	5.8	1.72	U-Series	Equal to	355-12	SZ78-002-001	Coral	123	6									2	3	Szabo et al., 1978	Alexander Simms	2021-02-20 02:13:15
438	21.0928	-86.8657	Cancun, Mexico		Mexico	Quintana Roo	Sea Level Indicator	Beach deposit or beachrock	They are using the elevation of the beach stratification within the beach ridge deposits	Not reported	4.8	1	-1	2.8	Not reported	5.8	1.72	U-Series	Equal to	355-14	SZ78-003-001	Coral	120	6									2	3	Szabo et al., 1978	Alexander Simms	2021-02-20 02:13:15
439	20.7276	-87.0318	Palya del Carmen, Mexico Szabo et al., 1978 age	Szabo et al., 1978 age	Mexico	Quintana Roo	Sea Level Indicator	Shallow water coral reef facies	Corals from a backreef environment	Not reported	2	1	-3.5	2	Not reported	5.5	1.41	U-Series	Equal to	293-9	SZ78-004-001	Coral	123	6									3	4	Szabo et al., 1978	Alexander Simms	2020-08-21 19:23:44
440	20.4529	-87.4194	Akumal, Mexico Szabo et al., 1978 age	Szabo et al., 1978 age	Mexico	Quintana Roo	Sea Level Indicator	Shallow water coral reef facies	Corals from a backreef environment	Not reported	2	1	-3.5	2	Not reported	5.5	1.41	U-Series	Equal to	256	SZ78-006-001	Coral	125	15									3	4	Szabo et al., 1978	Alexander Simms	2020-08-21 19:24:53
441	20.3665	-87.0183	Cozumel, Mexico Szabo et al., 1978 age	Szabo et al., 1978 age	Mexico	Quintana Roo	Sea Level Indicator	Coral reef terrace (general definition)	Corals from a reef	Not reported	2	1	-3.5	2	Not reported	5.5	1.41	U-Series	Equal to	C-22	SZ78-005-001	Coral	121	6									3	4	Szabo et al., 1978	Alexander Simms	2020-08-21 19:26:35
445	20.5808	-87.12	Xcaret, Mexico Transect URT. This is the "upper reef"	Transect URT. This is the "upper reef"	Mexico	Quintana Roo	Sea Level Indicator	Coral reef terrace (general definition)	Well-developed and described paleo reef	Not reported	5.5	0.15	-0.2	0.4	Mean Sea Level / General definition	5.7	0.25	U-Series	Equal to	xD4-2a	BL09-003-001	Coral	117	1	117.24	0.54							5	4	Blanchon et al., 2009 Blanchon and Perry, 2004 Chutcharavan et al., in prep.	Alexander Simms	2021-02-19 23:53:43
445	20.5808	-87.12	Xcaret, Mexico Transect URT. This is the "upper reef"	Transect URT. This is the "upper reef"	Mexico	Quintana Roo	Sea Level Indicator	Coral reef terrace (general definition)	Well-developed and described paleo reef	Not reported	5.5	0.15	-0.2	0.4	Mean Sea Level / General definition	5.7	0.25	U-Series	Equal to	xE2-2a	BL09-004-001	Coral	117.7	1.1	117.87	1.48							5	4	Blanchon et al., 2009 Blanchon and Perry, 2004 Chutcharavan et al., in prep.	Alexander Simms	2021-02-19 23:53:43
445	20.5808	-87.12	Xcaret, Mexico Transect URT. This is the "upper reef"	Transect URT. This is the "upper reef"	Mexico	Quintana Roo	Sea Level Indicator	Coral reef terrace (general definition)	Well-developed and described paleo reef	Not reported	5.5	0.15	-0.2	0.4	Mean Sea Level / General definition	5.7	0.25	U-Series	Equal to	xD4-3a	BL09-005-001	Coral	119.5	1.1	120.96	0.63							5	4	Blanchon et al., 2009 Blanchon and Perry, 2004 Chutcharavan et al., in prep.	Alexander Simms	2021-02-19 23:53:43
446	20.5808	-87.12	Xcaret, Mexico Transect LRT. This is the lower of the two reefs.	Transect LRT. This is the lower of the two reefs.	Mexico	Quintana Roo	Sea Level Indicator	Coral reef terrace (general definition)	Well-developed and described paleo reef	Not reported	2.5	0.15	-0.2	0.4	Mean Sea Level / General definition	2.7	0.25	U-Series	Equal to	xA4-2b	BL09-007-001	Coral	132.6	1.6	131.23	0.94							5	4	Blanchon et al., 2009 Blanchon and Perry, 2004 Chutcharavan et al., in prep.	Alexander Simms	2021-02-19 23:55:05
446	20.5808	-87.12	Xcaret, Mexico Transect LRT. This is the lower of the two reefs.	Transect LRT. This is the lower of the two reefs.	Mexico	Quintana Roo	Sea Level Indicator	Coral reef terrace (general definition)	Well-developed and described paleo reef	Not reported	2.5	0.15	-0.2	0.4	Mean Sea Level / General definition	2.7	0.25	U-Series	Equal to	xA4-2c	BL09-007-002	Coral	134.3	1.4	134.75	0.88							5	4	Blanchon et al., 2009 Blanchon and Perry, 2004 Chutcharavan et al., in prep.	Alexander Simms	2021-02-19 23:55:05
409	28.4423	-96.422	Port O'Connor, Texas Cores PO09-01 and PO09-02	Cores PO09-01 and PO09-02	United States of America	Texas	Sea Level Indicator	Beach ridge	This RSL indicator is an old beach/barrier island. The elevation reported is not the elevation of the age but of the average difference between the MIS5e feature and its modern equivalent.	LiDAR	2.8	2.7	1.3	5.6	North American Vertical Datum of 1988 (NAVD88	1.5	3.88	Luminescence	Equal to	PO09-01 366-388 cm	SI13-001-001	OSL	127.9	8.7							Equal to	= MIS 5e	2	3	Simms et al., 2013 Paine, 1993 Price, 1933	Alexander Simms	2021-02-20 02:14:21
409	28.4423	-96.422	Port O'Connor, Texas Cores PO09-01 and PO09-02	Cores PO09-01 and PO09-02	United States of America	Texas	Sea Level Indicator	Beach ridge	This RSL indicator is an old beach/barrier island. The elevation reported is not the elevation of the age but of the average difference between the MIS5e feature and its modern equivalent.	LiDAR	2.8	2.7	1.3	5.6	North American Vertical Datum of 1988 (NAVD88	1.5	3.88	Luminescence	Equal to	PO09-02 243-268 cm	SI13-002-001	OSL	120.1	8.4							Equal to	= MIS 5e	2	3	Simms et al., 2013 Paine, 1993 Price, 1933	Alexander Simms	2021-02-20 02:14:21
410	29.6744	-94.6135	Pine Island, Texas Core SP09-02	Core SP09-02	United States of America	Texas	Sea Level Indicator	Beach ridge	This RSL indicator is an old beach/barrier island. The elevation reported is not the elevation of the age but of the average difference between the MIS5e feature and its modern equivalent.	LiDAR	2.8	3	1.1	5.2	North American Vertical Datum of 1988 (NAVD88	1.7	3.96	Luminescence	Equal to	SP09-02 122-147 cm	SI13-003-001	OSL	119	7							Equal to	= MIS 5e	2	3	Simms et al., 2013	Alexander Simms	2021-02-20 02:14:11
411	29.7034	-85.2344	Apalachicola, Florida		United States of America	Florida	Sea Level Indicator	Beach deposit or beachrock	GPR analysis of paleo beach ridges. They chose the stratigraphic contact between overwash and shoreface deposits.	LiDAR	3.75	0.25	1	0	North American Vertical Datum of 1988 (NAVD88	2.75	0.25	Luminescence	Equal to	TMG02-01	BU12-001-001	OSL	128.1	9.9							Equal to	= MIS 5e	4	3	Burdette et al., 2012 Donoghue, J.F. and Tanner, W.F. Otvos, 1992	Alexander Simms	2021-02-20 02:13:53
411	29.7034	-85.2344	Apalachicola, Florida		United States of America	Florida	Sea Level Indicator	Beach deposit or beachrock	GPR analysis of paleo beach ridges. They chose the stratigraphic contact between overwash and shoreface deposits.	LiDAR	3.75	0.25	1	0	North American Vertical Datum of 1988 (NAVD88	2.75	0.25	Luminescence	Equal to	TMG02-02	BU12-002-001	OSL	127.2	11.6							Equal to	= MIS 5e	4	3	Burdette et al., 2012 Donoghue, J.F. and Tanner, W.F. Otvos, 1992	Alexander Simms	2021-02-20 02:13:53
411	29.7034	-85.2344	Apalachicola, Florida		United States of America	Florida	Sea Level Indicator	Beach deposit or beachrock	GPR analysis of paleo beach ridges. They chose the stratigraphic contact between overwash and shoreface deposits.	LiDAR	3.75	0.25	1	0	North American Vertical Datum of 1988 (NAVD88	2.75	0.25	Luminescence	Equal to	TMG03-01	BU12-003-001	OSL	108.55	8.35							Equal to	= MIS 5e	4	3	Burdette et al., 2012 Donoghue, J.F. and Tanner, W.F. Otvos, 1992	Alexander Simms	2021-02-20 02:13:53
411	29.7034	-85.2344	Apalachicola, Florida		United States of America	Florida	Sea Level Indicator	Beach deposit or beachrock	GPR analysis of paleo beach ridges. They chose the stratigraphic contact between overwash and shoreface deposits.	LiDAR	3.75	0.25	1	0	North American Vertical Datum of 1988 (NAVD88	2.75	0.25	Luminescence	Equal to	TMG03-02	BU12-004-001	OSL	138.5	12.5							Equal to	= MIS 5e	4	3	Burdette et al., 2012 Donoghue, J.F. and Tanner, W.F. Otvos, 1992	Alexander Simms	2021-02-20 02:13:53
411	29.7034	-85.2344	Apalachicola, Florida		United States of America	Florida	Sea Level Indicator	Beach deposit or beachrock	GPR analysis of paleo beach ridges. They chose the stratigraphic contact between overwash and shoreface deposits.	LiDAR	3.75	0.25	1	0	North American Vertical Datum of 1988 (NAVD88	2.75	0.25	Luminescence	Equal to	TMG04-01	BU12-005-001	OSL	120.1	10.6							Equal to	= MIS 5e	4	3	Burdette et al., 2012 Donoghue, J.F. and Tanner, W.F. Otvos, 1992	Alexander Simms	2021-02-20 02:13:53
411	29.7034	-85.2344	Apalachicola, Florida		United States of America	Florida	Sea Level Indicator	Beach deposit or beachrock	GPR analysis of paleo beach ridges. They chose the stratigraphic contact between overwash and shoreface deposits.	LiDAR	3.75	0.25	1	0	North American Vertical Datum of 1988 (NAVD88	2.75	0.25	Luminescence	Equal to	JHR-01	BU12-006-001	OSL	133.3	12							Equal to	= MIS 5e	4	3	Burdette et al., 2012 Donoghue, J.F. and Tanner, W.F. Otvos, 1992	Alexander Simms	2021-02-20 02:13:53
411	29.7034	-85.2344	Apalachicola, Florida		United States of America	Florida	Sea Level Indicator	Beach deposit or beachrock	GPR analysis of paleo beach ridges. They chose the stratigraphic contact between overwash and shoreface deposits.	LiDAR	3.75	0.25	1	0	North American Vertical Datum of 1988 (NAVD88	2.75	0.25	Luminescence	Equal to	JHR-03	BU12-008-001	OSL	112.6	8.8							Equal to	= MIS 5e	4	3	Burdette et al., 2012 Donoghue, J.F. and Tanner, W.F. Otvos, 1992	Alexander Simms	2021-02-20 02:13:53
411	29.7034	-85.2344	Apalachicola, Florida		United States of America	Florida	Sea Level Indicator	Beach deposit or beachrock	GPR analysis of paleo beach ridges. They chose the stratigraphic contact between overwash and shoreface deposits.	LiDAR	3.75	0.25	1	0	North American Vertical Datum of 1988 (NAVD88	2.75	0.25	Luminescence	Equal to	JHR-02	BU12-007-001	OSL	115.2	8.5							Equal to	= MIS 5e	4	3	Burdette et al., 2012 Donoghue, J.F. and Tanner, W.F. Otvos, 1992	Alexander Simms	2021-02-20 02:13:53
411	29.7034	-85.2344	Apalachicola, Florida		United States of America	Florida	Sea Level Indicator	Beach deposit or beachrock	GPR analysis of paleo beach ridges. They chose the stratigraphic contact between overwash and shoreface deposits.	LiDAR	3.75	0.25	1	0	North American Vertical Datum of 1988 (NAVD88	2.75	0.25	Luminescence	Equal to	CPR-01	BU12-009-001	OSL	113.8	9.8							Equal to	= MIS 5e	4	3	Burdette et al., 2012 Donoghue, J.F. and Tanner, W.F. Otvos, 1992	Alexander Simms	2021-02-20 02:13:53
411	29.7034	-85.2344	Apalachicola, Florida		United States of America	Florida	Sea Level Indicator	Beach deposit or beachrock	GPR analysis of paleo beach ridges. They chose the stratigraphic contact between overwash and shoreface deposits.	LiDAR	3.75	0.25	1	0	North American Vertical Datum of 1988 (NAVD88	2.75	0.25	Luminescence	Equal to	CPR-02	BU12-010-001	OSL	138.7	11.1							Equal to	= MIS 5e	4	3	Burdette et al., 2012 Donoghue, J.F. and Tanner, W.F. Otvos, 1992	Alexander Simms	2021-02-20 02:13:53
411	29.7034	-85.2344	Apalachicola, Florida		United States of America	Florida	Sea Level Indicator	Beach deposit or beachrock	GPR analysis of paleo beach ridges. They chose the stratigraphic contact between overwash and shoreface deposits.	LiDAR	3.75	0.25	1	0	North American Vertical Datum of 1988 (NAVD88	2.75	0.25	Luminescence	Equal to	CPR-03	BU12-011-001	OSL	138.2	12.6							Equal to	= MIS 5e	4	3	Burdette et al., 2012 Donoghue, J.F. and Tanner, W.F. Otvos, 1992	Alexander Simms	2021-02-20 02:13:53
411	29.7034	-85.2344	Apalachicola, Florida		United States of America	Florida	Sea Level Indicator	Beach deposit or beachrock	GPR analysis of paleo beach ridges. They chose the stratigraphic contact between overwash and shoreface deposits.	LiDAR	3.75	0.25	1	0	North American Vertical Datum of 1988 (NAVD88	2.75	0.25	Luminescence	Equal to	CCI-02	BU12-012-001	OSL	111.9	7.9							Equal to	= MIS 5e	4	3	Burdette et al., 2012 Donoghue, J.F. and Tanner, W.F. Otvos, 1992	Alexander Simms	2021-02-20 02:13:53
411	29.7034	-85.2344	Apalachicola, Florida		United States of America	Florida	Sea Level Indicator	Beach deposit or beachrock	GPR analysis of paleo beach ridges. They chose the stratigraphic contact between overwash and shoreface deposits.	LiDAR	3.75	0.25	1	0	North American Vertical Datum of 1988 (NAVD88	2.75	0.25	Luminescence	Equal to	CCI-03	BU12-013-001	OSL	126.3	10.5							Equal to	= MIS 5e	4	3	Burdette et al., 2012 Donoghue, J.F. and Tanner, W.F. Otvos, 1992	Alexander Simms	2021-02-20 02:13:53
411	29.7034	-85.2344	Apalachicola, Florida		United States of America	Florida	Sea Level Indicator	Beach deposit or beachrock	GPR analysis of paleo beach ridges. They chose the stratigraphic contact between overwash and shoreface deposits.	LiDAR	3.75	0.25	1	0	North American Vertical Datum of 1988 (NAVD88	2.75	0.25	Luminescence	Equal to	CCI-05	BU12-014-001	OSL	120.1	9.6							Equal to	= MIS 5e	4	3	Burdette et al., 2012 Donoghue, J.F. and Tanner, W.F. Otvos, 1992	Alexander Simms	2021-02-20 02:13:53
411	29.7034	-85.2344	Apalachicola, Florida		United States of America	Florida	Sea Level Indicator	Beach deposit or beachrock	GPR analysis of paleo beach ridges. They chose the stratigraphic contact between overwash and shoreface deposits.	LiDAR	3.75	0.25	1	0	North American Vertical Datum of 1988 (NAVD88	2.75	0.25	Luminescence	Equal to	BPG01-01	BU12-015-001	OSL	136.2	11.6							Equal to	= MIS 5e	4	3	Burdette et al., 2012 Donoghue, J.F. and Tanner, W.F. Otvos, 1992	Alexander Simms	2021-02-20 02:13:53
411	29.7034	-85.2344	Apalachicola, Florida		United States of America	Florida	Sea Level Indicator	Beach deposit or beachrock	GPR analysis of paleo beach ridges. They chose the stratigraphic contact between overwash and shoreface deposits.	LiDAR	3.75	0.25	1	0	North American Vertical Datum of 1988 (NAVD88	2.75	0.25	Luminescence	Equal to	BPG01-02	BU12-016-001	OSL	125.3	11							Equal to	= MIS 5e	4	3	Burdette et al., 2012 Donoghue, J.F. and Tanner, W.F. Otvos, 1992	Alexander Simms	2021-02-20 02:13:53
411	29.7034	-85.2344	Apalachicola, Florida		United States of America	Florida	Sea Level Indicator	Beach deposit or beachrock	GPR analysis of paleo beach ridges. They chose the stratigraphic contact between overwash and shoreface deposits.	LiDAR	3.75	0.25	1	0	North American Vertical Datum of 1988 (NAVD88	2.75	0.25	Luminescence	Equal to	OR-01	BU12-017-001	OSL	136.6	10.4							Equal to	= MIS 5e	4	3	Burdette et al., 2012 Donoghue, J.F. and Tanner, W.F. Otvos, 1992	Alexander Simms	2021-02-20 02:13:53
424	30.3887	-89.014	Gulfport/Biloxi		United States of America	Mississippi	Sea Level Indicator	Beach ridge	Ophiomorpha burrows within an old beach ridge (actually a paleobarrier/shoreline with well-developed beach ridges ontop of it).	Not reported	6	4.8	1	5.2	Mean Sea Level / General definition	5	5.45	Luminescence	Equal to	B-3	OT005-001	OSL	117	12.4							Equal to	= MIS 5e	2	3	Otvos, 2005	Alexander Simms	2021-02-20 01:59:31
425	30.2435	-87.8302	Morgan Peninsula, Alabama		United States of America	Alabama	Sea Level Indicator	Beach ridge	LiDAR elevations of beach ridges	Not reported	4.5	0.5	2.5	2	Mean Sea Level / General definition	2	1.11	Luminescence	Equal to	443	BL03-001-001	OSL	137.75	34.42							Equal to	= MIS 5e	2	3	Blum et al., 2003 Rodriguez and Meyer, 2006	Alexander Simms	2021-02-20 02:00:07
425	30.2435	-87.8302	Morgan Peninsula, Alabama		United States of America	Alabama	Sea Level Indicator	Beach ridge	LiDAR elevations of beach ridges	Not reported	4.5	0.5	2.5	2	Mean Sea Level / General definition	2	1.11	Luminescence	Equal to	434	BL03-002-001	OSL	133.47	21.06							Equal to	= MIS 5e	2	3	Blum et al., 2003 Rodriguez and Meyer, 2006	Alexander Simms	2021-02-20 02:00:07
771	28.2428	-96.8596	Aransas, Texas		United States of America	Texas	Sea Level Indicator	Beach ridge	This RSL indicator is an old beach/barrier island. The elevation reported is not the elevation of the age but of the average difference between the MIS5e feature and its modern equivalent.	LiDAR	3.3	3.1	1.6	6	North American Vertical Datum of 1988 (NAVD88	1.7	4.31	Luminescence	Equal to	SP09-02 122-147 cm	SI13-003-001	OSL	119	7							Equal to	= MIS 5e	2	2	Simms et al., 2013	Alexander Simms	2021-02-20 02:12:08
771	28.2428	-96.8596	Aransas, Texas		United States of America	Texas	Sea Level Indicator	Beach ridge	This RSL indicator is an old beach/barrier island. The elevation reported is not the elevation of the age but of the average difference between the MIS5e feature and its modern equivalent.	LiDAR	3.3	3.1	1.6	6	North American Vertical Datum of 1988 (NAVD88	1.7	4.31	Other age constraint	Equal to	Texas Stratigraphic Correlation									136.6	112	Equal to	= MIS 5e	2	2	Simms et al., 2013	Alexander Simms	2021-02-20 02:12:08
772	27.9617	-97.1264	Live Oak, Texas		United States of America	Texas	Sea Level Indicator	Beach ridge	This RSL indicator is an old beach/barrier island. The elevation reported is not the elevation of the age but of the average difference between the MIS5e feature and its modern equivalent.	LiDAR	4.7	4.1	1.9	5.4	North American Vertical Datum of 1988 (NAVD88	2.8	4.9	Luminescence	Equal to	SP09-02 122-147 cm	SI13-003-001	OSL	119	7							Equal to	= MIS 5e	2	2	Simms et al., 2013	Alexander Simms	2021-02-20 02:11:58
772	27.9617	-97.1264	Live Oak, Texas		United States of America	Texas	Sea Level Indicator	Beach ridge	This RSL indicator is an old beach/barrier island. The elevation reported is not the elevation of the age but of the average difference between the MIS5e feature and its modern equivalent.	LiDAR	4.7	4.1	1.9	5.4	North American Vertical Datum of 1988 (NAVD88	2.8	4.9	Other age constraint	Equal to	Texas Stratigraphic Correlation									136.6	112	Equal to	= MIS 5e	2	2	Simms et al., 2013	Alexander Simms	2021-02-20 02:11:58
773	27.5807	-97.3458	Encinal, Texas		United States of America	Texas	Sea Level Indicator	Beach ridge	This RSL indicator is an old beach/barrier island. The elevation reported is not the elevation of the age but of the average difference between the MIS5e feature and its modern equivalent.	LiDAR	5.3	3.3	1.7	5.6	North American Vertical Datum of 1988 (NAVD88	3.6	4.32	Luminescence	Equal to	SP09-02 122-147 cm	SI13-003-001	OSL	119	7							Equal to	= MIS 5e	2	2	Simms et al., 2013	Alexander Simms	2021-02-20 02:11:46
773	27.5807	-97.3458	Encinal, Texas		United States of America	Texas	Sea Level Indicator	Beach ridge	This RSL indicator is an old beach/barrier island. The elevation reported is not the elevation of the age but of the average difference between the MIS5e feature and its modern equivalent.	LiDAR	5.3	3.3	1.7	5.6	North American Vertical Datum of 1988 (NAVD88	3.6	4.32	Other age constraint	Equal to	Texas Stratigraphic Correlation									136.6	112	Equal to	= MIS 5e	2	2	Simms et al., 2013	Alexander Simms	2021-02-20 02:11:46
774	29.2291	-95.1026	Hoskins Island, Texas		United States of America	Texas	Sea Level Indicator	Beach ridge	This RSL indicator is an old beach/barrier island. The elevation reported is not the elevation of the age but of the average difference between the MIS5e feature and its modern equivalent.	LiDAR	1	2.1	0.8	4.6	North American Vertical Datum of 1988 (NAVD88	0.2	3.11	Luminescence	Equal to	SP09-02 122-147 cm	SI13-003-001	OSL	119	7							Equal to	= MIS 5e	2	1	Simms et al., 2013	Alexander Simms	2021-02-20 02:11:36
774	29.2291	-95.1026	Hoskins Island, Texas		United States of America	Texas	Sea Level Indicator	Beach ridge	This RSL indicator is an old beach/barrier island. The elevation reported is not the elevation of the age but of the average difference between the MIS5e feature and its modern equivalent.	LiDAR	1	2.1	0.8	4.6	North American Vertical Datum of 1988 (NAVD88	0.2	3.11	Other age constraint	Equal to	Texas Stratigraphic Correlation									136.6	112	Equal to	= MIS 5e	2	1	Simms et al., 2013	Alexander Simms	2021-02-20 02:11:36
775	29.1493	-95.1884	Chocolate Bayou, Texas		United States of America	Texas	Sea Level Indicator	Beach ridge	This RSL indicator is an old beach/barrier island. The elevation reported is not the elevation of the age but of the average difference between the MIS5e feature and its modern equivalent.	LiDAR	1.2	2.2	0.8	4.6	North American Vertical Datum of 1988 (NAVD88	0.4	3.18	Luminescence	Equal to	SP09-02 122-147 cm	SI13-003-001	OSL	119	7							Equal to	= MIS 5e	2	2	Simms et al., 2013	Alexander Simms	2021-02-20 02:11:26
775	29.1493	-95.1884	Chocolate Bayou, Texas		United States of America	Texas	Sea Level Indicator	Beach ridge	This RSL indicator is an old beach/barrier island. The elevation reported is not the elevation of the age but of the average difference between the MIS5e feature and its modern equivalent.	LiDAR	1.2	2.2	0.8	4.6	North American Vertical Datum of 1988 (NAVD88	0.4	3.18	Other age constraint	Equal to	Texas Stratigraphic Correlation									136.6	112	Equal to	= MIS 5e	2	2	Simms et al., 2013	Alexander Simms	2021-02-20 02:11:26
776	29.5386	-94.7543	Smith Point, Texas		United States of America	Texas	Sea Level Indicator	Beach ridge	This RSL indicator is an old beach/barrier island. The elevation reported is not the elevation of the age but of the average difference between the MIS5e feature and its modern equivalent.	LiDAR	2.2	2.7	1.1	5.2	North American Vertical Datum of 1988 (NAVD88	1.1	3.74	Luminescence	Equal to	SP09-02 122-147 cm	SI13-003-001	OSL	119	7							Equal to	= MIS 5e	2	2	Simms et al., 2013	Alexander Simms	2021-02-20 02:11:16
776	29.5386	-94.7543	Smith Point, Texas		United States of America	Texas	Sea Level Indicator	Beach ridge	This RSL indicator is an old beach/barrier island. The elevation reported is not the elevation of the age but of the average difference between the MIS5e feature and its modern equivalent.	LiDAR	2.2	2.7	1.1	5.2	North American Vertical Datum of 1988 (NAVD88	1.1	3.74	Other age constraint	Equal to	Texas Stratigraphic Correlation									136.6	112	Equal to	= MIS 5e	2	2	Simms et al., 2013	Alexander Simms	2021-02-20 02:11:16
777	29.9441	-94.3083	Fannett, Texas		United States of America	Texas	Sea Level Indicator	Beach ridge	This RSL indicator is an old beach/barrier island. The elevation reported is not the elevation of the age but of the average difference between the MIS5e feature and its modern equivalent.	LiDAR	5.8	3	0.7	4.4	North American Vertical Datum of 1988 (NAVD88	5.1	3.72	Luminescence	Equal to	SP09-02 122-147 cm	SI13-003-001	OSL	119	7							Equal to	= MIS 5e	2	2	Simms et al., 2013	Alexander Simms	2021-02-20 02:11:02
777	29.9441	-94.3083	Fannett, Texas		United States of America	Texas	Sea Level Indicator	Beach ridge	This RSL indicator is an old beach/barrier island. The elevation reported is not the elevation of the age but of the average difference between the MIS5e feature and its modern equivalent.	LiDAR	5.8	3	0.7	4.4	North American Vertical Datum of 1988 (NAVD88	5.1	3.72	Other age constraint	Equal to	Texas Stratigraphic Correlation									136.6	112	Equal to	= MIS 5e	2	2	Simms et al., 2013	Alexander Simms	2021-02-20 02:11:02
778	30.1912	-93.9616	Vidor, Texas		United States of America	Texas	Sea Level Indicator	Beach ridge	This RSL indicator is an old beach/barrier island. The elevation reported is not the elevation of the age but of the average difference between the MIS5e feature and its modern equivalent.	LiDAR	7.9	2.2	0.7	4.4	North American Vertical Datum of 1988 (NAVD88	7.2	3.11	Luminescence	Equal to	SP09-02 122-147 cm	SI13-003-001	OSL	119	7							Equal to	= MIS 5e	2	1	Simms et al., 2013	Alexander Simms	2021-02-20 02:10:46
778	30.1912	-93.9616	Vidor, Texas		United States of America	Texas	Sea Level Indicator	Beach ridge	This RSL indicator is an old beach/barrier island. The elevation reported is not the elevation of the age but of the average difference between the MIS5e feature and its modern equivalent.	LiDAR	7.9	2.2	0.7	4.4	North American Vertical Datum of 1988 (NAVD88	7.2	3.11	Other age constraint	Equal to	Texas Stratigraphic Correlation									136.6	112	Equal to	= MIS 5e	2	1	Simms et al., 2013	Alexander Simms	2021-02-20 02:10:46
891	30.3012	-89.3684	Bay Saint Louis Also known as English Lookout	Also known as English Lookout	United States of America	Mississippi	Sea Level Indicator	Beach ridge	Ophiomorpha burrows within an old beach ridge (actually a paleobarrier/shoreline with well-developed beach ridges ontop of it).	Not reported	4.6	3.8	1	5.2	Mean Sea Level / General definition	3.6	4.6	Luminescence	Equal to	B-1	OT05-004-001	OSL	160	17							Equal to	= MIS 5e	1	2	Otvos, 2005	Alexander Simms	2021-02-20 02:07:51
892	30.3568	-88.7138	Gautier		United States of America	Mississippi	Sea Level Indicator	Beach ridge	Ophiomorpha burrows within an old beach ridge (actually a paleobarrier/shoreline with well-developed beach ridges ontop of it).	Not reported	4.1	2.8	1	5.2	Mean Sea Level / General definition	3.1	3.82	Luminescence	Equal to	B-5a	OT005-002	OSL	124	10.8							Equal to	= MIS 5e	2	3	Otvos, 2005	Alexander Simms	2021-02-20 02:08:29
893	30.3621	-87.1754	Gulf Breeze		United States of America	Mississippi	Sea Level Indicator	Beach ridge	Ophiomorpha burrows within an old beach ridge (actually a paleobarrier/shoreline with well-developed beach ridges ontop of it).	Not reported	6.9	6.7	1.9	6.2	Mean Sea Level / General definition	5	7.38	Luminescence	Equal to	B-6	OT005-003	OSL	116.1	9.1							Equal to	= MIS 5e	2	3	Otvos, 2005	Alexander Simms	2021-02-20 02:09:17
915	28.2385	-96.8696	Willow Creek		United States of America	Texas	Sea Level Indicator	Beach deposit or beachrock	A shell layer within a beach ridge	Not reported	2	1	-0.75	3.5	Mean Sea Level / General definition	2.75	2.01	Luminescence	Equal to	PO09-01 366-388 cm	SI13-001-001	OSL	127.9	8.7							Equal to	= MIS 5e	3	3	Paine, 1993 Simms et al., 2013	Alexander Simms	2021-02-20 02:10:19
915	28.2385	-96.8696	Willow Creek		United States of America	Texas	Sea Level Indicator	Beach deposit or beachrock	A shell layer within a beach ridge	Not reported	2	1	-0.75	3.5	Mean Sea Level / General definition	2.75	2.01	Luminescence	Equal to	PO09-02 243-268 cm	SI13-002-001	OSL	120.1	8.4							Equal to	= MIS 5e	3	3	Paine, 1993 Simms et al., 2013	Alexander Simms	2021-02-20 02:10:19

## Sheet: RSL from single coral
WALIS U-Series ID	Public	Material type	Details on dated material	Were U-Series data recalculated?	Type of spectrometry	Are RSL estimates available for this record?	Are data on tectonics available?	Reference(s)	IGSN	Sample ID	Analysis ID	Reported ID	Date of analysis	Accepted?	Reason for rejection	Accepted in other study?	Reason for rejection in other studies	Other study ID	Screening	Location	Site	Additional site information	Latitude (decimal degrees)	Longitude (decimal degrees)	Reported Latitude	Reported Longitude	Are Lat/Long estimated?	Comments on geographic coordinates	Original elevation datum used	Elevation measurement method	Reported elevation (m)	Reported elevation uncertainty (m)	Elevation above MSL (m)	Elevation uncertainty used (m)	Interpreted elevation relative to mllw/mlws (m)	Elevation comments	Tectonic category	Published uplift rate (m/ky)	Published uncertainty in uplift rate (m/ky)	Interpreted uplift rate (m/ky)	Interpreted uplift rate uncertainty (m/ky)	Comments (uplift), including sources of uplift rates	Terrace ID	Facies description	Reported as in situ?	Reported as in growth position?	Taxa information (as reported)	Family	Genus
1479	1	Coral		Yes	Mass Spectrometer	Yes	Yes	Blanchon et al., 2009 Chutcharavan et al., in prep.		BL09-003	BL09-003-001	xD4-2a	2009-01-01	Yes		No	Multiple analyses of the same coral; subsample ages do not overlap within analytical uncertainty and may be part of diagenetic array	Chutcharavan et al., in prep.	Flexible protocol	Mexico - Yucatan	Xcaret	Upper reef tract	20.5799	-87.1191	N/A	N/A	Yes		Mean Sea Level / General definition	Not reported	4.7	0.15	4.7	1	4.8	mlws elevation calculated using data for Cozumel from Nautical Map 28196, Isla Cozumel; used +/- 1 m uncertainty because reported elevation uncertainty only accounts for tidal amplitude	Stable							reef crest-colony	Yes	Not Reported	Acropora palmata	Acroporidae	Acropora
1482	1	Coral		Yes	Mass Spectrometer	Yes	Yes	Blanchon et al., 2009 Chutcharavan et al., in prep.		BL09-004	BL09-004-001	xE2-2a	2009-01-01	No	Multiple analyses of same coral; this subsample outside "strictly reliable" range for initial uranium isotopic composition (delta 234Ui = 146.6 to 149.6 per mil)	No	Multiple analyses of the same coral; this subsample rejected because could be part of diagenetic array	Chutcharavan et al., in prep.	Flexible protocol	Mexico - Yucatan	Xcaret	Upper reef tract	20.5799	-87.1191	N/A	N/A	Yes		Mean Sea Level / General definition	Not reported	4	0.15	4	1	4.1	mlws elevation calculated using data for Cozumel from Nautical Map 28196, Isla Cozumel; used +/- 1 m uncertainty because reported elevation uncertainty only accounts for tidal amplitude	Stable							reef crest-colony	Yes	Not Reported	Acropora palmata	Acroporidae	Acropora
1485	1	Coral		Yes	Mass Spectrometer	Yes	Yes	Blanchon et al., 2009 Chutcharavan et al., in prep.		BL09-005	BL09-005-001	xD4-3a	2009-01-01	Yes		No	Multiple analyses of the same coral; subsample ages do not overlap within analytical uncertainty	Chutcharavan et al., in prep.	Flexible protocol	Mexico - Yucatan	Xcaret	Upper reef tract	20.5799	-87.1191	N/A	N/A	Yes		Mean Sea Level / General definition	Not reported	4.9	0.15	4.9	1	5	mlws elevation calculated using data for Cozumel from Nautical Map 28196, Isla Cozumel; used +/- 1 m uncertainty because reported elevation uncertainty only accounts for tidal amplitude	Stable							reef crest-colony	Yes	Not Reported	Acropora palmata	Acroporidae	Acropora
1491	1	Coral		Yes	Mass Spectrometer	Yes	Yes	Blanchon et al., 2009 Chutcharavan et al., in prep.		BL09-007	BL09-007-001	xA4-2b	2009-01-01	Yes		No	Multiple analyses of the same coral; subsample ages not reproducible	Chutcharavan et al., in prep.	Flexible protocol	Mexico - Yucatan	Xcaret	Lower reef tract	20.5799	-87.1191	N/A	N/A	Yes		Mean Sea Level / General definition	Not reported	2.2	0.15	2.2	1	2.3	mlws elevation calculated using data for Cozumel from Nautical Map 28196, Isla Cozumel; used +/- 1 m uncertainty because reported elevation uncertainty only accounts for tidal amplitude	Stable							reef crest-colony	Yes	Not Reported	Acropora palmata	Acroporidae	Acropora
1492	1	Coral		Yes	Mass Spectrometer	Yes	Yes	Blanchon et al., 2009 Chutcharavan et al., in prep.		BL09-007	BL09-007-002	xA4-2c	2009-01-01	Yes		No	Multiple analyses of the same coral; subsample ages not reproducible	Chutcharavan et al., in prep.	Flexible protocol	Mexico - Yucatan	Xcaret	Lower reef tract	20.5799	-87.1191	N/A	N/A	Yes		Mean Sea Level / General definition	Not reported	2.2	0.15	2.2	1	2.3	mlws elevation calculated using data for Cozumel from Nautical Map 28196, Isla Cozumel; used +/- 1 m uncertainty because reported elevation uncertainty only accounts for tidal amplitude	Stable							reef crest-colony	Yes	Not Reported	Acropora palmata	Acroporidae	Acropora
1693	0	Coral	Corals in outcrop	No	Mass spectrometer	Yes	Yes	Gischler et al., 2000 Mazzullo, 2006		GI00-001	GI00-001-001	(1)		Yes		N/A		n/a		Belize	Ambergris Cay		18.121	-87.8343			Yes	I estimated them using GoogleEarth and the location map including a description in Mazzullo, 2006.	Not reported	Not reported	0.3	NR	0.3	1		I used the elevation reported by Mazzullo (2006), which explicitly states "above MSL" on page 1021.	Subsidence	0.039				They estimate subsidence of 39 mm/ky based on an assumed MIS5e elevation of 6 m. But this is circular reasoning for some uses of this data.		Coral from an outcrop	Not Stated	Not Stated	Acropora palmata		Acropora
1694	0	Coral	Corals taken from a core	No	Mass spectrometer	Yes	Yes	Gischler et al., 2000		GI00-002	GI00-002-001	(2)		Yes		Yes		n/a		Belize	Glovers Reef Hole 1		16.7482	-87.7984			Yes	I estimated them using GoogleEarth and their location map in Gischler and Lomando (1999 - JSR).	Not reported	Not reported	-9	N/A	-9	1		Very few details on the methods and datums, other than an "elevation" thus I assumed mean sea level and assigned an uncertainty of +/-1 m. The modern tidal range in the region is < 0.5 m.	Subsidence	0.1155	0.0035			They estimate subsidence of 112-119 mm/ky based on an assumed MIS5e elevation of 6 m. But this is circular reasoning for some uses of this data.		Coral from a drillcore.	Not Stated	Not Stated	Motastraea annularis		Montastraea
1695	0	Coral	Corals taken from a core	No	Mass spectrometer	Yes	Yes	Gischler et al., 2000		GI00-003	GI00-003-001	(3)		No		N/A		n/a		Belize	Glovers Reef Hole 3		16.7803	-87.8331			Yes	I estimated them using GoogleEarth and their location map in Gischler and Lomando (1999-JSR).	Not reported	Not reported	-8	N/A	-8	1		Very few details on the methods and datums, other than an "elevation" thus I assumed mean sea level and assigned an uncertainty of +/-1 m. The modern tidal range in the region is < 0.5 m.	Subsidence	0.1155	0.0035			They estimate subsidence of 112-119 mm/ky based on an assumed MIS5e elevation of 6 m. But this is circular reasoning for some uses of this data.		Coral from a drillcore.	Not Stated	Not Stated	Motastraea annularis		Montastraea
1696	0	Coral	Corals taken from a core	No	Mass spectrometer	Yes	Yes	Gischler et al., 2000		GI00-004	GI00-004-001	(4)		Yes		N/A		n/a		Belize	Lighthouse Hole 11		17.3752	-87.5153			Yes	I estimated them using GoogleEarth and their location map in Gischler and Lomando (1999 - JSR).	Not reported	Not reported	-9.5	N/A	-9.5	1		Very few details on the methods and datums, other than an "elevation" thus I assumed mean sea level and assigned an uncertainty of +/-1 m. The modern tidal range in the region is < 0.5 m.	Subsidence	0.1155	0.0035			They estimate subsidence of 112-119 mm/ky based on an assumed MIS5e elevation of 6 m. But this is circular reasoning for some uses of this data.		Coral from a drillcore.	Not Stated	Not Stated	Acropora cervicornis		Acropora
1697	0	Coral	Corals taken from a core	No	Mass spectrometer	Yes	Yes	Gischler et al., 2000		GI00-005	GI00-005-001	(5)		Yes		N/A		n/a		Belize	Lighthouse Hole 12		17.4648	-87.4901			Yes	I estimated them using GoogleEarth and their location map in Gischler and Lomando (1999 - JSR).	Not reported	Not reported	-9.5	N/A	-9.5	1		Very few details on the methods and datums, other than an "elevation" thus I assumed mean sea level and assigned an uncertainty of +/-1 m. The modern tidal range in the region is < 0.5 m.	Subsidence	0.1155	0.0035			They estimate subsidence of 112-119 mm/ky based on an assumed MIS5e elevation of 6 m. But this is circular reasoning for some uses of this data.		Coral from a drillcore.	Not Stated	Not Stated	Acropora palmata		Acropora
1698	0	Coral	Corals taken from a core	No	Mass spectrometer	Yes	Yes	Gischler et al., 2000		GI00-006	GI00-006-001	(6)		Yes		N/A		n/a		Belize	Turneffe Hole 8		17.1688	-87.9021			Yes	I estimated them using GoogleEarth and their location map in Gischler and Lomando (1999 - JSR).	Not reported	Not reported	-4	N/A	-4	1		Very few details on the methods and datums, other than an "elevation" thus I assumed mean sea level and assigned an uncertainty of +/-1 m. The modern tidal range in the region is < 0.5 m.	Subsidence	0.0695	0.0005			They estimate subsidence of 69-70 mm/ky based on an assumed MIS5e elevation of 6 m. But this is circular reasoning for some uses of this data.		Coral from a drillcore.	Not Stated	Not Stated	Acropora palmata		Acropora
1699	0	Coral	Corals taken from a core	No	Mass spectrometer	Yes	Yes	Gischler et al., 2000		GI00-007	GI00-007-001	(7)		Yes		N/A		n/a		Belize	Turneffe Hole 8		17.1688	-87.9021			Yes	I estimated them using GoogleEarth and their location map in Gischler and Lomando (1999-JSR).	Not reported	Not reported	-4	N/A	-4	1		Very few details on the methods and datums, other than an "elevation" thus I assumed mean sea level and assigned an uncertainty of +/-1 m. The modern tidal range in the region is < 0.5 m.	Subsidence	0.1155	0.0035			They estimate subsidence of 112-119 mm/ky based on an assumed MIS5e elevation of 6 m. But this is circular reasoning for some uses of this data.		Coral from a drillcore.	Not Stated	Not Stated	Motastraea annularis		Montastraea
[truncated: 64 more columns]

## Sheet: RSL proxies
WALIS RSL ID	Public	Site name	Subsite	Nation	Region	Main reference	Additional references	Latitude (decimal degrees)	Longitude (decimal degrees)	Horizontal Positioning Technique	Is this a marine/terrestrial limiting record?	Type of RSL Indicator	Indicator description	Upper limit of modern analog (m)	Lower limit of modern analog (m)	Quantification of indicative meaning	Sea level datum	Elevation measurement technique	Record includes upper and lower elevation limits?	Upper elevation of indicator (m)	Lower elevation of indicator (m)	Upper/Lower elevation measurement error (±1σ) (m)	RSL indicator elevation (m)	RSL indicator elevation error (m)	Notes on elevation	Reference Water Level (m)	Indicative Range (m)	Paleo Relative Sea Level (m)	Paleo Relative Sea Level Uncertainty (m)	Is data on vertical land movements (independent from the sea level record) available?	Tectonic category	Tectonic category comments	Published VLM rate (m/ky)	Published VLM rate uncertainty (m/ky)	Interpreted VLM rate (m/ky)	Interpreted VLM rate (m/ky) uncertainty	Comments on VLM rates	Age attribution	U-Series constraint	U-series age IDs	AAR constraint	Amino Acid Racemization age IDs	ESR constraint	Electro Spin Resonance age IDs	Luminescence constraint	Luminescence age IDs	Stratigraphy constraint	Stratigraphic context/age IDs	Other constraint
448	0	Ambergis Cay, Belize	Reef Point	Belize	Corozal	Mazzullo, 2006	N/A	18.1244	-87.8305	Not Specified	Sea Level Indicator	Shallow water coral reef facies	Barrier Reef/reef-flat	0	-0.3	Modern analog data	Mean Sea Level / General definition	Not reported	No				0.5	1	Mazzullo (2006) describes this locality and facies as a reef flat environment. Therefore using the modern analogue of Cubit et al., (1986) for a reef flat I use an indicative meaning of mean lower low water with an error of 1/2 the tidal range. For this site, since the elevation datums and facies architecture are not as well described as at Xceret, I increased the error to +/-1.0 m.	-0.15	0.3	0.65	1.01	Yes	Subsidence	The region appears to be undergoing subsidence with increasing rates in the offshore directions	0.039	NR			This subsidence rate is based on Gichler et al. (2000) who assume that MIS5e RSL was 5-6 m. Thus depending on the use of this data it might be circular reasoning.	U-Series Amino Acid Racemization	Equal to	MA06-001-001	Equal to	MA006-002-001 MA006-003-001
450	0	Roatan, Honduras	Interior Fossil Coral Reef	Honduras	Islas de la Bahia	Cox et al., 2008	N/A	16.2781	-86.5937	Google Earth from publication map	Sea Level Indicator	Coral reef terrace (general definition)		-0.3	-17	Modern analog data	Mean Sea Level / General definition	Not reported	No				37.2	0.15	The uncertainty is based on their stated tidal range of the area (0.15 m) and that they used the level of the ocean as their datum. The coral species was not given thus I assigned the water depth as the largest range of the commonly dated corals in the region. (-0.3 for the upper limit - A. palmata and -17 m for the lower limit - M. annularis).	-8.65	16.7	45.85	8.35	Yes	Uplifting	Uplifting but a variable rates across the platform.	1.7	1.3			They give a range of 0.4 to 3.0 mm/yr based on uplifted Holocene marine terraces.	Electro Spin Resonance					Equal to	CO08-001-001
438	0	Cancun, Mexico		Mexico	Quintana Roo	Szabo et al., 1978	N/A	21.0928	-86.8657	Google Earth from publication map	Sea Level Indicator	Beach deposit or beachrock	They are using the elevation of the beach stratification within the beach ridge deposits	0.4	-2.4	Modern analog data	Not reported	Not reported	No				4.8	1	I used IMCalc to determine the "breaking depth" of the waves which was assumed to be the depth of the foreshore/upper shoreface contact.	-1	2.8	5.8	1.72	No								U-Series	Equal to	SZ78-001-001 SZ78-002-001 SZ78-003-001
439	0	Palya del Carmen, Mexico	Szabo et al., 1978 age	Mexico	Quintana Roo	Szabo et al., 1978	N/A	20.7276	-87.0318	Google Earth from publication map	Sea Level Indicator	Shallow water coral reef facies	Corals from a backreef environment	-2.5	-4.5	Modern analog data	Not reported	Not reported	No				2	1	For this assignment I have used values that confirm to the original interpretations of the original authors of Szabo et al. (1978) and Ward and Brady (1979) based on stratigraphic relationships and the general paleogeography at the time. A strict adhesion to the indicative meaning of their coral types using the modern elevation habitat zone for Montastrea corals of Hibbert et al. (2016) would res…	-3.5	2	5.5	1.41	No								U-Series	Equal to	SZ78-004-001
440	0	Akumal, Mexico	Szabo et al., 1978 age	Mexico	Quintana Roo	Szabo et al., 1978	N/A	20.4529	-87.4194	Google Earth from publication map	Sea Level Indicator	Shallow water coral reef facies	Corals from a backreef environment	-2.5	-4.5	Modern analog data	Not reported	Not reported	No				2	1	For this assignment I have used values that confirm to the original interpretations of the original authors of Szabo et al. (1978) and Ward and Brady (1979) based on stratigraphic relationships and the general paleogeography at the time. A strict adhesion to the indicative meaning of their coral types using the modern elevation habitat zone for Montastrea corals of Hibbert et al. (2016) would res…	-3.5	2	5.5	1.41	No								U-Series	Equal to	SZ78-006-001
441	0	Cozumel, Mexico	Szabo et al., 1978 age	Mexico	Quintana Roo	Szabo et al., 1978	N/A	20.3665	-87.0183	Google Earth from publication map	Sea Level Indicator	Coral reef terrace (general definition)	Corals from a reef	-2.5	-4.5	Modern analog data	Not reported	Not reported	No				2	1	For this assignment I have used values that confirm to the original interpretations of the original authors of Szabo et al. (1978) and Ward and Brady (1979) based on stratigraphic relationships and the general paleogeography at the time. A strict adhesion to the indicative meaning of their coral types using the modern elevation habitat zone for Montastrea corals of Hibbert et al. (2016) would res…	-3.5	2	5.5	1.41	No								U-Series	Equal to	SZ78-005-001
445	0	Xcaret, Mexico	Transect URT. This is the "upper reef"	Mexico	Quintana Roo	Blanchon et al., 2009	Blanchon and Perry, 2004	20.5808	-87.12	Google Earth from publication map	Sea Level Indicator	Coral reef terrace (general definition)	Well-developed and described paleo reef	0	-0.4	Modern analog data	Mean Sea Level / General definition	Not reported	No				5.5	0.15	I used a value of -0.2+/-0.2 for the analogue for a reef flat (Cubit et al., 1985) applied to the elevation of the reef flat of 5.5 m.	-0.2	0.4	5.7	0.25	No								U-Series	Equal to	BL09-003-001 BL09-004-001 BL09-005-001
446	0	Xcaret, Mexico	Transect LRT. This is the lower of the two reefs.	Mexico	Quintana Roo	Blanchon et al., 2009	Blanchon and Perry, 2004	20.5808	-87.12	Google Earth from publication map	Sea Level Indicator	Coral reef terrace (general definition)	Well-developed and described paleo reef	0	-0.4	Modern analog data	Mean Sea Level / General definition	Not reported	No				2.5	0.15	I used a value of -0.2+/-0.2 for the analogue for a reef flat (Cubit et al., 1985) applied to the elevation of the reef flat of 5.5 m.	-0.2	0.4	2.7	0.25	No								U-Series	Equal to	BL09-007-001 BL09-007-002
425	0	Morgan Peninsula, Alabama		United States of America	Alabama	Blum et al., 2003	Rodriguez and Meyer, 2006	30.2435	-87.8302	Google Earth from publication map	Sea Level Indicator	Beach ridge	LiDAR elevations of beach ridges	3.5	1.5	Modern analog data	Mean Sea Level / General definition	Not reported	No				4.5	0.5	The height of the modern beach ridge was used as an analogue. We used the heights described by Rodriguez and Meyer (2006) but the ages of Blum et al. (2003). Alternatively, I used the DEM for the region and comparing the modern Morgan Peninsula average elevation subtracted from the average elevation of the LIG portion of the peninsula results in a RSL estimate of +0.9+/-4.4 m.	2.5	2	2	1.11	No								Luminescence							Equal to	BL03-001-001 BL03-002-001
411	0	Apalachicola, Florida		United States of America	Florida	Burdette et al., 2012	Donoghue, J.F. and Tanner, W.F. Otvos, 1992	29.7034	-85.2344	Handheld GPS	Sea Level Indicator	Beach deposit or beachrock	GPR analysis of paleo beach ridges. They chose the stratigraphic contact between overwash and shoreface deposits.	1	1	Modern analog data	North American Vertical Datum of 1988 (NAVD88	LiDAR	No				3.75	0.25	They suggest a "transition" point between overwash fan deposits overlying foreshore deposits occurs today at ~1.0 m. They then give the elevation of the same "transition" point of the LIG as observed in GPR at 3.75 m. I also determined the difference in elevation between the entire LIG shoreline and the equivalent modern shoreline to be 2.9+/-4.2 m - similar to the difference they found.	1	0	2.75	0.25	No								Luminescence							Equal to	BU12-001-001 BU12-002-001 BU12-003-001 BU12-004-001 BU12-005-001 BU12-006-001 BU12-007-001 BU12-008-001 BU12-009-001 BU12-010-001 BU12-011-001 BU12-012-001 BU12-013-001 BU12-014-001 BU12-015-001 BU12-016-001 BU12-017-001
424	0	Gulfport/Biloxi		United States of America	Mississippi	Otvos, 2005	N/A	30.3887	-89.014	Google Earth from publication map	Sea Level Indicator	Beach ridge	Ophiomorpha burrows within an old beach ridge (actually a paleobarrier/shoreline with well-developed beach ridges ontop of it).	3.6	-1.6	Modern analog data	Mean Sea Level / General definition	Not reported	No				6	4.8	The modern analogue is the average elevation and standard deviation of the modern barrier island. The RSL indicator elevation is the average elevation of the LIG shoreline. I also included an additional error of +/-2.0 m to account for error in the LIDAR/DEM surveys.	1	5.2	5	5.45	No								Luminescence							Equal to	OT005-001
891	0	Bay Saint Louis	Also known as English Lookout	United States of America	Mississippi	Otvos, 2005	N/A	30.3012	-89.3684	Google Earth from publication map	Sea Level Indicator	Beach ridge	Ophiomorpha burrows within an old beach ridge (actually a paleobarrier/shoreline with well-developed beach ridges ontop of it).	3.6	-1.6	Modern analog data	Mean Sea Level / General definition	Not reported	No				4.6	3.8	The modern analogue is the average elevation and standard deviation of the modern barrier island. The RSL indicator elevation is the average elevation of the LIG shoreline. I also included an error of +/-2 m to account for uncertainty in the LIDAR.	1	5.2	3.6	4.6	No								Luminescence							Equal to	OT05-004-001
892	0	Gautier		United States of America	Mississippi	Otvos, 2005	N/A	30.3568	-88.7138	Google Earth from publication map	Sea Level Indicator	Beach ridge	Ophiomorpha burrows within an old beach ridge (actually a paleobarrier/shoreline with well-developed beach ridges ontop of it).	3.6	-1.6	Modern analog data	Mean Sea Level / General definition	Not reported	No				4.1	2.8	The modern analogue is the average elevation and standard deviation of the modern barrier island. The RSL indicator elevation is the average elevation of the LIG shoreline. I also included an error of +/-2 m to account for uncertainty in the LIDAR.	1	5.2	3.1	3.82	No								Luminescence							Equal to	OT005-002
893	0	Gulf Breeze		United States of America	Mississippi	Otvos, 2005	N/A	30.3621	-87.1754	Google Earth from publication map	Sea Level Indicator	Beach ridge	Ophiomorpha burrows within an old beach ridge (actually a paleobarrier/shoreline with well-developed beach ridges ontop of it).	5	-1.2	Modern analog data	Mean Sea Level / General definition	Not reported	No				6.9	6.7	The modern analogue is the average elevation and standard deviation of the modern barrier island. The RSL indicator elevation is the average elevation of the LIG shoreline. I also included an error of +/-2 m to account for uncertainty in the LIDAR.	1.9	6.2	5	7.38	No								Luminescence							Equal to	OT005-003
409	0	Port O'Connor, Texas	Cores PO09-01 and PO09-02	United States of America	Texas	Simms et al., 2013	Paine, 1993 Price, 1933	28.4423	-96.422	Cordinates in paper	Sea Level Indicator	Beach ridge	This RSL indicator is an old beach/barrier island. The elevation reported is not the elevation of the age but of the average difference between the MIS5e feature and its modern equivalent.	4.1	-1.5	Modern analog data	North American Vertical Datum of 1988 (NAVD88	LiDAR	No				2.8	2.7	The elevation of the MIS5e feature and modern equivalent were taken from airborn LIDAR surveys of the entire barrier features. I also included an additional error of +/-2.0 m to account for error in the LIDAR/DEM surveys.	1.3	5.6	1.5	3.88	Yes	Subsidence	A slowly subsiding passive margin.	0.07	0.03	0.07	0.03	The rates of subsidence were calculated by running a GIA model of what the elevation of the MIS5e shoreline should have been. So beware of circular reasoning if using this data to calibrate GIA models. The values are very similar to those if looking at Miocene buried strata.	Luminescence	Equal to		Equal to		Equal to		Equal to	SI13-001-001 SI13-002-001			Equal to
410	0	Pine Island, Texas	Core SP09-02	United States of America	Texas	Simms et al., 2013	N/A	29.6744	-94.6135	Cordinates in paper	Sea Level Indicator	Beach ridge	This RSL indicator is an old beach/barrier island. The elevation reported is not the elevation of the age but of the average difference between the MIS5e feature and its modern equivalent.	3.7	-1.5	Modern analog data	North American Vertical Datum of 1988 (NAVD88	LiDAR	No				2.8	3	The elevation of the MIS5e feature and modern equivalent were taken from airborn LIDAR surveys of the features. I also included an additional error of +/-2.0 m to account for error in the LIDAR/DEM surveys.	1.1	5.2	1.7	3.96	Yes	Subsidence	A slowly subsiding passive margin.	0.07	0.03	0.07	0.03	The rates of subsidence were calculated by running a GIA model of what the elevation of the MIS5e shoreline should have been. So beware of circular reasoning if using this data to calibrate GIA models. The values are very similar to those if looking at Miocene buried strata.	Luminescence							Equal to	SI13-003-001
771	0	Aransas, Texas		United States of America	Texas	Simms et al., 2013	N/A	28.2428	-96.8596	Google Earth from location name	Sea Level Indicator	Beach ridge	This RSL indicator is an old beach/barrier island. The elevation reported is not the elevation of the age but of the average difference between the MIS5e feature and its modern equivalent.	4.6	-1.4	Modern analog data	North American Vertical Datum of 1988 (NAVD88	LiDAR	No				3.3	3.1	The elevation of the MIS5e feature and modern equivalent were taken from airborn LIDAR surveys of the features. I also included an error of +/-2 m to account for uncertainty in the LIDAR.	1.6	6	1.7	4.31	Yes	Subsidence	A slowly subsiding passive margin.	0.07	0.03	0.07	0.03	The rates of subsidence were calculated by running a GIA model of what the elevation of the MIS5e shoreline should have been. So beware of circular reasoning if using this data to calibrate GIA models. The values are very similar to those if looking at Miocene buried strata.	Luminescence Other dating							Equal to	SI13-003-001			Equal to
772	0	Live Oak, Texas		United States of America	Texas	Simms et al., 2013	N/A	27.9617	-97.1264	Google Earth from location name	Sea Level Indicator	Beach ridge	This RSL indicator is an old beach/barrier island. The elevation reported is not the elevation of the age but of the average difference between the MIS5e feature and its modern equivalent.	4.6	-0.8	Modern analog data	North American Vertical Datum of 1988 (NAVD88	LiDAR	No				4.7	4.1	The elevation of the MIS5e feature and modern equivalent were taken from airborn LIDAR surveys of the features. I also included an error of +/-2 m to account for uncertainty in the LIDAR.	1.9	5.4	2.8	4.9	Yes	Subsidence	A slowly subsiding passive margin.	0.06	0.03	0.06	0.03	The rates of subsidence were calculated by running a GIA model of what the elevation of the MIS5e shoreline should have been. So beware of circular reasoning if using this data to calibrate GIA models. The values are very similar to those if looking at Miocene buried strata.	Luminescence Other dating							Equal to	SI13-003-001			Equal to
773	0	Encinal, Texas		United States of America	Texas	Simms et al., 2013	N/A	27.5807	-97.3458	Google Earth from location name	Sea Level Indicator	Beach ridge	This RSL indicator is an old beach/barrier island. The elevation reported is not the elevation of the age but of the average difference between the MIS5e feature and its modern equivalent.	4.5	-1.1	Modern analog data	North American Vertical Datum of 1988 (NAVD88	LiDAR	No				5.3	3.3	The elevation of the MIS5e feature and modern equivalent were taken from airborn LIDAR surveys of the features. I also included an error of +/-2 m to account for uncertainty in the LIDAR.	1.7	5.6	3.6	4.32	Yes	Subsidence	A slowly subsiding passive margin.	0.05	0.03	0.05	0.03	The rates of subsidence were calculated by running a GIA model of what the elevation of the MIS5e shoreline should have been. So beware of circular reasoning if using this data to calibrate GIA models. The values are very similar to those if looking at Miocene buried strata.	Luminescence Other dating							Equal to	SI13-003-001			Equal to
774	0	Hoskins Island, Texas		United States of America	Texas	Simms et al., 2013	N/A	29.2291	-95.1026	Google Earth from location name	Sea Level Indicator	Beach ridge	This RSL indicator is an old beach/barrier island. The elevation reported is not the elevation of the age but of the average difference between the MIS5e feature and its modern equivalent.	3.1	-1.5	Modern analog data	North American Vertical Datum of 1988 (NAVD88	LiDAR	No				1	2.1	The elevation of the MIS5e feature and modern equivalent were taken from airborn LIDAR surveys of the features. I also included an error of +/-2 m to account for uncertainty in the LIDAR.	0.8	4.6	0.2	3.11	Yes	Subsidence	A slowly subsiding passive margin.	0.09	0.03	0.09	0.03	The rates of subsidence were calculated by running a GIA model of what the elevation of the MIS5e shoreline should have been. So beware of circular reasoning if using this data to calibrate GIA models. The values are very similar to those if looking at Miocene buried strata.	Luminescence Other dating							Equal to	SI13-003-001			Equal to
775	0	Chocolate Bayou, Texas		United States of America	Texas	Simms et al., 2013	N/A	29.1493	-95.1884	Google Earth from location name	Sea Level Indicator	Beach ridge	This RSL indicator is an old beach/barrier island. The elevation reported is not the elevation of the age but of the average difference between the MIS5e feature and its modern equivalent.	3.1	-1.5	Modern analog data	North American Vertical Datum of 1988 (NAVD88	LiDAR	No				1.2	2.2	The elevation of the MIS5e feature and modern equivalent were taken from airborn LIDAR surveys of the features. I also included an error of +/-2 m to account for uncertainty in the LIDAR.	0.8	4.6	0.4	3.18	Yes	Subsidence	A slowly subsiding passive margin.	0.09	0.03	0.09	0.03	The rates of subsidence were calculated by running a GIA model of what the elevation of the MIS5e shoreline should have been. So beware of circular reasoning if using this data to calibrate GIA models. The values are very similar to those if looking at Miocene buried strata.	Luminescence Other dating							Equal to	SI13-003-001			Equal to
776	0	Smith Point, Texas		United States of America	Texas	Simms et al., 2013	N/A	29.5386	-94.7543	Google Earth from location name	Sea Level Indicator	Beach ridge	This RSL indicator is an old beach/barrier island. The elevation reported is not the elevation of the age but of the average difference between the MIS5e feature and its modern equivalent.	3.7	-1.5	Modern analog data	North American Vertical Datum of 1988 (NAVD88	LiDAR	No				2.2	2.7	The elevation of the MIS5e feature and modern equivalent were taken from airborn LIDAR surveys of the features. I also included an error of +/-2 m to account for uncertainty in the LIDAR.	1.1	5.2	1.1	3.74	Yes	Subsidence	A slowly subsiding passive margin.	0.08	0.03	0.08	0.03	The rates of subsidence were calculated by running a GIA model of what the elevation of the MIS5e shoreline should have been. So beware of circular reasoning if using this data to calibrate GIA models. The values are very similar to those if looking at Miocene buried strata.	Luminescence Other dating							Equal to	SI13-003-001			Equal to
777	0	Fannett, Texas		United States of America	Texas	Simms et al., 2013	N/A	29.9441	-94.3083	Google Earth from location name	Sea Level Indicator	Beach ridge	This RSL indicator is an old beach/barrier island. The elevation reported is not the elevation of the age but of the average difference between the MIS5e feature and its modern equivalent.	2.9	-1.5	Modern analog data	North American Vertical Datum of 1988 (NAVD88	LiDAR	No				5.8	3	The elevation of the MIS5e feature and modern equivalent were taken from airborn LIDAR surveys of the features. I also included an error of +/-2 m to account for uncertainty in the LIDAR.	0.7	4.4	5.1	3.72	Yes	Subsidence	A slowly subsiding passive margin.	0.05	0.03	0.05	0.03	The rates of subsidence were calculated by running a GIA model of what the elevation of the MIS5e shoreline should have been. So beware of circular reasoning if using this data to calibrate GIA models. The values are very similar to those if looking at Miocene buried strata.	Luminescence Other dating							Equal to	SI13-003-001			Equal to
778	0	Vidor, Texas		United States of America	Texas	Simms et al., 2013	N/A	30.1912	-93.9616	Google Earth from location name	Sea Level Indicator	Beach ridge	This RSL indicator is an old beach/barrier island. The elevation reported is not the elevation of the age but of the average difference between the MIS5e feature and its modern equivalent.	2.9	-1.5	Modern analog data	North American Vertical Datum of 1988 (NAVD88	LiDAR	No				7.9	2.2	The elevation of the MIS5e feature and modern equivalent were taken from airborn LIDAR surveys of the features. I also included an error of +/-2 m to account for uncertainty in the LIDAR.	0.7	4.4	7.2	3.11	Yes	Subsidence	A slowly subsiding passive margin.	0.03	0.03	0.03	0.03	The rates of subsidence were calculated by running a GIA model of what the elevation of the MIS5e shoreline should have been. So beware of circular reasoning if using this data to calibrate GIA models. The values are very similar to those if looking at Miocene buried strata.	Luminescence Other dating							Equal to	SI13-003-001			Equal to
915	0	Willow Creek		United States of America	Texas	Paine, 1993	Simms et al., 2013	28.2385	-96.8696	Google Earth from publication map	Sea Level Indicator	Beach deposit or beachrock	A shell layer within a beach ridge	1	-2.5	Modern analog data	Mean Sea Level / General definition	Not reported	No				2	1	No details were given on the error of the elevation measurements so I assumed +/-1 m	-0.75	3.5	2.75	2.01	No								Luminescence							Equal to	SI13-001-001 SI13-002-001
[truncated: 7 more columns]

## Sheet: RSL indicators
WALIS RSLind ID	Name of RSL indicator	Description of RSL indicator	RWL_descr	Description of IR	Indicator reference(s)	Record created by	Record updated by	LastUpdate
11	Beach deposit or beachrock	Definition by Mauz et al., 2015: "Beachrocks are lithified coastal deposits that are organized in sequences of slabs with seaward inclination generally between 5° and 15°". Definition of indicative meaning from Rovere et al., 2016.	(Ordinary berm + breaking depth) / 2	Ordinary berm - breaking depth	Mauz et al., 2015 Rovere et al., 2016	Alessio Rovere	WALIS Admin	2021-01-05
12	Beach ridge	Definition by Otvos,2000: "[beach ridges are] stabilized, relict intertidal and supratidal, eolian and wave-built shore ridges that may consist of either siliciclastic or calcareous clastic matter of a wide range of clasts dimensions, from fine sand to cobbles and boulders". Definition of indicative meaning from Rovere et al., 2016.	(Storm wave swash height + Ordinary berm)/2	Storm wave swash height - Ordinary berm	Otvos, 2000 Rovere et al., 2016	Alessio Rovere	WALIS Admin	2021-01-05
13	Coral reef terrace (general definition)	Coral-built flat surface, corresponding to shallow-water reef terrace to reef crest. The definition of indicative meaning is derived from Rovere et al., 2016, and it represents the broadest possible indicative range, that can be refined with information on coral living ranges.	(Mean Lower Low Water + Breaking dept)/2	Mean Lower Low Water - Breaking dept	Rovere et al., 2016	Alessio Rovere	Alessio Rovere	2020-04-19
23	Shallow water coral reef facies	For use when specific reference is given to a modern coral species and or morphological occurrence.	Mean Low Water Springs	Mean low water springs to depth of modern living analogue.	Guillaume et al., 2013 Vyverberg et al., 2018	Patrick Boyden	Patrick Boyden	2020-09-18

## Sheet: Elevation measurement
WALIS ElevMeas ID	Measurement technique	Description	Typical accuracy	Record created by	Record updated by	LastUpdate
15	LiDAR	Light detection and ranging	0.25 cm	Alexander Simms		2020-04-06 16:13:07
7	Not reported	The elevation measurement technique was not reported, most probably hand level or metered tape.	20% of the original elevation reported added in root mean square to the sea level datum error	Alessio Rovere	Alessio Rovere	2020-01-31 11:06:03

## Sheet: Geographic positioning
WALIS GeoPos ID	Measurement technique	Description	Typical accuracy	Record created by	Record updated by	LastUpdate
8	Cordinates in paper	Coordinates given in the reviewed paper, with no details.	Depending on the original information.	Alessio Rovere	Alessio Rovere	2020-04-19 13:50:24
9	Google Earth from location name	The location name was geocoded in Google Earth.	Depending on how precise is the Google Earth geocoding.	Alessio Rovere	Alessio Rovere	2020-04-19 13:51:23
4	Google Earth from publication map	Location data is presented in a map within the publication, coordinates were extracted by georeferencing the map into Google Earth and digitizing points of interest.	Up to tens of meters, depending on how precise is the originally published map.	Alessio Rovere	Alessio Rovere	2020-04-19 13:50:54
7	Handheld GPS		5 m	Deirdre Ryan		2019-12-02 08:52:35
1	Not Specified	The original study does not specify how the location of sites/samples was measured.	Not available or not reported	Alessio Rovere	Alessio Rovere	2020-04-19 14:02:33

## Sheet: Sea level datums
WALIS SLdatum ID	Datum name	Datum description	Datum uncertainty	Reference(s)	Record created by	Record updated by	LastUpdate
1	Mean Sea Level / General definition	General definition of MSL, with no indications on the datum to which it is referred to.	A datum uncertainty may be established on a case-by-case basis.		Alessio Rovere	Alessio Rovere	2020-04-19 14:25:12
11	North American Vertical Datum of 1988 (NAVD88	The official datum of the US National Spatial Reference System for the continental USA and Alaska.	Variable	National Geodetic Survey, 2018	Alexander Simms		2020-04-04 18:16:33
13	Not reported	The sea level datum is not reported and impossible to derive from metadata.	N/A		Alessio Rovere		2020-04-07 14:27:03

## Sheet: U-Series (corals)
WALIS U-Series ID	Public	Material type	Details on dated material	Were U-Series data recalculated?	Type of spectrometry	Are RSL estimates available for this record?	Are data on tectonics available?	Reference(s)	IGSN	Sample ID	Analysis ID	Reported ID	Date of analysis	Accepted?	Reason for rejection	Accepted in other study?	Reason for rejection in other studies	Other study ID	Screening	Location	Site	Additional site information	Latitude (decimal degrees)	Longitude (decimal degrees)	Reported Latitude	Reported Longitude	Are Lat/Long estimated?	Comments on geographic coordinates	Original elevation datum used	Elevation measurement method	Reported elevation (m)	Reported elevation uncertainty (m)	Elevation above MSL (m)	Elevation uncertainty used (m)	Interpreted elevation relative to mllw/mlws (m)	Elevation comments	Tectonic category	Published uplift rate (m/ky)	Published uncertainty in uplift rate (m/ky)	Interpreted uplift rate (m/ky)	Interpreted uplift rate uncertainty (m/ky)	Comments (uplift), including sources of uplift rates	Terrace ID	Facies description	Reported as in situ?	Reported as in growth position?	Taxa information (as reported)	Family	Genus
1479	1	Coral		Yes	Mass Spectrometer	Yes	Yes	Blanchon et al., 2009 Chutcharavan et al., in prep.		BL09-003	BL09-003-001	xD4-2a	2009-01-01	Yes		No	Multiple analyses of the same coral; subsample ages do not overlap within analytical uncertainty and may be part of diagenetic array	Chutcharavan et al., in prep.	Flexible protocol	Mexico - Yucatan	Xcaret	Upper reef tract	20.5799	-87.1191	N/A	N/A	Yes		Mean Sea Level / General definition	Not reported	4.7	0.15	4.7	1	4.8	mlws elevation calculated using data for Cozumel from Nautical Map 28196, Isla Cozumel; used +/- 1 m uncertainty because reported elevation uncertainty only accounts for tidal amplitude	Stable							reef crest-colony	Yes	Not Reported	Acropora palmata	Acroporidae	Acropora
1482	1	Coral		Yes	Mass Spectrometer	Yes	Yes	Blanchon et al., 2009 Chutcharavan et al., in prep.		BL09-004	BL09-004-001	xE2-2a	2009-01-01	No	Multiple analyses of same coral; this subsample outside "strictly reliable" range for initial uranium isotopic composition (delta 234Ui = 146.6 to 149.6 per mil)	No	Multiple analyses of the same coral; this subsample rejected because could be part of diagenetic array	Chutcharavan et al., in prep.	Flexible protocol	Mexico - Yucatan	Xcaret	Upper reef tract	20.5799	-87.1191	N/A	N/A	Yes		Mean Sea Level / General definition	Not reported	4	0.15	4	1	4.1	mlws elevation calculated using data for Cozumel from Nautical Map 28196, Isla Cozumel; used +/- 1 m uncertainty because reported elevation uncertainty only accounts for tidal amplitude	Stable							reef crest-colony	Yes	Not Reported	Acropora palmata	Acroporidae	Acropora
1485	1	Coral		Yes	Mass Spectrometer	Yes	Yes	Blanchon et al., 2009 Chutcharavan et al., in prep.		BL09-005	BL09-005-001	xD4-3a	2009-01-01	Yes		No	Multiple analyses of the same coral; subsample ages do not overlap within analytical uncertainty	Chutcharavan et al., in prep.	Flexible protocol	Mexico - Yucatan	Xcaret	Upper reef tract	20.5799	-87.1191	N/A	N/A	Yes		Mean Sea Level / General definition	Not reported	4.9	0.15	4.9	1	5	mlws elevation calculated using data for Cozumel from Nautical Map 28196, Isla Cozumel; used +/- 1 m uncertainty because reported elevation uncertainty only accounts for tidal amplitude	Stable							reef crest-colony	Yes	Not Reported	Acropora palmata	Acroporidae	Acropora
1491	1	Coral		Yes	Mass Spectrometer	Yes	Yes	Blanchon et al., 2009 Chutcharavan et al., in prep.		BL09-007	BL09-007-001	xA4-2b	2009-01-01	Yes		No	Multiple analyses of the same coral; subsample ages not reproducible	Chutcharavan et al., in prep.	Flexible protocol	Mexico - Yucatan	Xcaret	Lower reef tract	20.5799	-87.1191	N/A	N/A	Yes		Mean Sea Level / General definition	Not reported	2.2	0.15	2.2	1	2.3	mlws elevation calculated using data for Cozumel from Nautical Map 28196, Isla Cozumel; used +/- 1 m uncertainty because reported elevation uncertainty only accounts for tidal amplitude	Stable							reef crest-colony	Yes	Not Reported	Acropora palmata	Acroporidae	Acropora
1492	1	Coral		Yes	Mass Spectrometer	Yes	Yes	Blanchon et al., 2009 Chutcharavan et al., in prep.		BL09-007	BL09-007-002	xA4-2c	2009-01-01	Yes		No	Multiple analyses of the same coral; subsample ages not reproducible	Chutcharavan et al., in prep.	Flexible protocol	Mexico - Yucatan	Xcaret	Lower reef tract	20.5799	-87.1191	N/A	N/A	Yes		Mean Sea Level / General definition	Not reported	2.2	0.15	2.2	1	2.3	mlws elevation calculated using data for Cozumel from Nautical Map 28196, Isla Cozumel; used +/- 1 m uncertainty because reported elevation uncertainty only accounts for tidal amplitude	Stable							reef crest-colony	Yes	Not Reported	Acropora palmata	Acroporidae	Acropora
1693	0	Coral	Corals in outcrop	No	Mass spectrometer	Yes	Yes	Gischler et al., 2000 Mazzullo, 2006		GI00-001	GI00-001-001	(1)		Yes		N/A		n/a		Belize	Ambergris Cay		18.121	-87.8343			Yes	I estimated them using GoogleEarth and the location map including a description in Mazzullo, 2006.	Not reported	Not reported	0.3	NR	0.3	1		I used the elevation reported by Mazzullo (2006), which explicitly states "above MSL" on page 1021.	Subsidence	0.039				They estimate subsidence of 39 mm/ky based on an assumed MIS5e elevation of 6 m. But this is circular reasoning for some uses of this data.		Coral from an outcrop	Not Stated	Not Stated	Acropora palmata		Acropora
1694	0	Coral	Corals taken from a core	No	Mass spectrometer	Yes	Yes	Gischler et al., 2000		GI00-002	GI00-002-001	(2)		Yes		Yes		n/a		Belize	Glovers Reef Hole 1		16.7482	-87.7984			Yes	I estimated them using GoogleEarth and their location map in Gischler and Lomando (1999 - JSR).	Not reported	Not reported	-9	N/A	-9	1		Very few details on the methods and datums, other than an "elevation" thus I assumed mean sea level and assigned an uncertainty of +/-1 m. The modern tidal range in the region is < 0.5 m.	Subsidence	0.1155	0.0035			They estimate subsidence of 112-119 mm/ky based on an assumed MIS5e elevation of 6 m. But this is circular reasoning for some uses of this data.		Coral from a drillcore.	Not Stated	Not Stated	Motastraea annularis		Montastraea
1695	0	Coral	Corals taken from a core	No	Mass spectrometer	Yes	Yes	Gischler et al., 2000		GI00-003	GI00-003-001	(3)		No		N/A		n/a		Belize	Glovers Reef Hole 3		16.7803	-87.8331			Yes	I estimated them using GoogleEarth and their location map in Gischler and Lomando (1999-JSR).	Not reported	Not reported	-8	N/A	-8	1		Very few details on the methods and datums, other than an "elevation" thus I assumed mean sea level and assigned an uncertainty of +/-1 m. The modern tidal range in the region is < 0.5 m.	Subsidence	0.1155	0.0035			They estimate subsidence of 112-119 mm/ky based on an assumed MIS5e elevation of 6 m. But this is circular reasoning for some uses of this data.		Coral from a drillcore.	Not Stated	Not Stated	Motastraea annularis		Montastraea
1696	0	Coral	Corals taken from a core	No	Mass spectrometer	Yes	Yes	Gischler et al., 2000		GI00-004	GI00-004-001	(4)		Yes		N/A		n/a		Belize	Lighthouse Hole 11		17.3752	-87.5153			Yes	I estimated them using GoogleEarth and their location map in Gischler and Lomando (1999 - JSR).	Not reported	Not reported	-9.5	N/A	-9.5	1		Very few details on the methods and datums, other than an "elevation" thus I assumed mean sea level and assigned an uncertainty of +/-1 m. The modern tidal range in the region is < 0.5 m.	Subsidence	0.1155	0.0035			They estimate subsidence of 112-119 mm/ky based on an assumed MIS5e elevation of 6 m. But this is circular reasoning for some uses of this data.		Coral from a drillcore.	Not Stated	Not Stated	Acropora cervicornis		Acropora
1697	0	Coral	Corals taken from a core	No	Mass spectrometer	Yes	Yes	Gischler et al., 2000		GI00-005	GI00-005-001	(5)		Yes		N/A		n/a		Belize	Lighthouse Hole 12		17.4648	-87.4901			Yes	I estimated them using GoogleEarth and their location map in Gischler and Lomando (1999 - JSR).	Not reported	Not reported	-9.5	N/A	-9.5	1		Very few details on the methods and datums, other than an "elevation" thus I assumed mean sea level and assigned an uncertainty of +/-1 m. The modern tidal range in the region is < 0.5 m.	Subsidence	0.1155	0.0035			They estimate subsidence of 112-119 mm/ky based on an assumed MIS5e elevation of 6 m. But this is circular reasoning for some uses of this data.		Coral from a drillcore.	Not Stated	Not Stated	Acropora palmata		Acropora
1698	0	Coral	Corals taken from a core	No	Mass spectrometer	Yes	Yes	Gischler et al., 2000		GI00-006	GI00-006-001	(6)		Yes		N/A		n/a		Belize	Turneffe Hole 8		17.1688	-87.9021			Yes	I estimated them using GoogleEarth and their location map in Gischler and Lomando (1999 - JSR).	Not reported	Not reported	-4	N/A	-4	1		Very few details on the methods and datums, other than an "elevation" thus I assumed mean sea level and assigned an uncertainty of +/-1 m. The modern tidal range in the region is < 0.5 m.	Subsidence	0.0695	0.0005			They estimate subsidence of 69-70 mm/ky based on an assumed MIS5e elevation of 6 m. But this is circular reasoning for some uses of this data.		Coral from a drillcore.	Not Stated	Not Stated	Acropora palmata		Acropora
1699	0	Coral	Corals taken from a core	No	Mass spectrometer	Yes	Yes	Gischler et al., 2000		GI00-007	GI00-007-001	(7)		Yes		N/A		n/a		Belize	Turneffe Hole 8		17.1688	-87.9021			Yes	I estimated them using GoogleEarth and their location map in Gischler and Lomando (1999-JSR).	Not reported	Not reported	-4	N/A	-4	1		Very few details on the methods and datums, other than an "elevation" thus I assumed mean sea level and assigned an uncertainty of +/-1 m. The modern tidal range in the region is < 0.5 m.	Subsidence	0.1155	0.0035			They estimate subsidence of 112-119 mm/ky based on an assumed MIS5e elevation of 6 m. But this is circular reasoning for some uses of this data.		Coral from a drillcore.	Not Stated	Not Stated	Motastraea annularis		Montastraea
1701	0	Coral	Samples taken from an outcrop	No	Mass spectrometer	No	No	Mazzullo, 2006		MA06-001	MA06-001-001	KW-90		Yes		N/A		n/a					18.1244	-87.8305			Yes	Taken from GoogleEarth based on the location map in the publication.	Mean Sea Level / General definition	Not reported	0.5	NR				No details given on datum or the elevation uncertainty but they do specifically state MSL when discussing elevation.	N/A							Barrier Reef and reef flat facies.	Not Stated	Not Stated	M annularis		Montastrea
1687	0	Coral	Boulders reworked into beach deposits	No	Mass spectrometer	No	No	Szabo et al., 1978		SZ78-001	SZ78-001-001	355-11	1978-01-01	Yes		N/A		n/a		Cancun, Mexico	Cancun	Eastern Yucatan	21.0928	-86.8657			Yes	Used GoogleEarth in combination with the map in the original publication.	Mean Sea Level / General definition	Not reported	4	NR				They interpret the beach ridge to represent sea levels 5-6 m above present.	N/A							Stratified beach deposits with slightly abraded coral heads reworked into them. "The base of the beach stratification is 3.5 to 6.5 m above present sea level." - Szabo et al., 1978	No	No	Coral heads of Diploria sp. and Montastrea sp.
1688	0	Coral	Coral Boulders reworked into beach deposits	No	Mass spectrometer	No	No	Szabo et al., 1978		SZ78-002	SZ78-002-001	355-12	1978-01-01	Yes		N/A		n/a					21.0928	-86.8657			Yes	From GoogleEarth and original publication map	Mean Sea Level / General definition	Not reported	4	NR				RSL interpretation is based on the height of the strand-plain deposits and not necessarily the elevation of the boulders in which the ages where acquired.	N/A							Strand-plan deposits with slightly abraded coral heads reworked into them.	No	No	Diploria sp. and Monstastrea sp.
1689	0	Coral	Coral Boulders reworked into beach deposits	No	Mass spectrometer	No	No	Szabo et al., 1978		SZ78-003	SZ78-003-001	355-14	1978-01-01	Yes		N/A		n/a					21.0928	-86.8657			Yes	From GoogleEarth and original publication map	Mean Sea Level / General definition	Not reported	4	NR				RSL elevation is based on the elevation of the strand-plain deposits in general and not necessarily the elevation of the boulder in which the age came from.	N/A							Strand-plan deposits with slightly abraded coral heads reworked into them.	No	No	Diploria sp. and Monstastrea sp.
1690	0	Coral	Corals buried in carbonate sands overlying buried subaerial crusts.	No	Mass spectrometer	No	No	Szabo et al., 1978		SZ78-004	SZ78-004-001	293-9	1978-01-01	Yes		N/A		n/a		Cancun, Mexico	Cancun	Eastern Yucatan	20.7276	-87.0318			Yes	Taken from GoogleEarth based on original publication map	Mean Sea Level / General definition	Not reported	2	NR				They interpret the overlying beach ridge to represent sea levels 5-6 m above present.	N/A							From some "backreef" corals developed beneath a strandplain deposits. Near an area with in situ corals but this block was "overturned". "The base of the beach stratification is 3.5 to 6.5 m above present sea level." - Szabo et al., 1978	No	No	Coral heads of Montastrea sp.		Montastrea
1691	0	Coral	Corals buried in carbonate sands overlying buried subaerial crusts.	No	Mass spectrometer	No	No	Szabo et al., 1978		SZ78-005	SZ78-005-001	C-22	1978-01-01	Yes		N/A		n/a		Cozumel, Mexico	Cozumel Island, Mexico	Eastern Yucatan	20.3665	-87.0183			Yes	Taken from GoogleEarth based on original publication map	Mean Sea Level / General definition	Not reported	2	NR				They interpret the overlying beach ridge to represent sea levels 5-6 m above present. But this information is not for this specific site but others within the study.	N/A							In situ reef?	Yes	Yes	Coral reef
1692	0	Coral	Corals buried in carbonate sands overlying buried subaerial crusts.	No	Mass spectrometer	No	No	Szabo et al., 1978		SZ78-006	SZ78-006-001	256	1978-01-01	Yes		N/A		n/a		Cancun, Mexico	Cancun	Eastern Yucatan	20.4529	-87.4194			Yes	Taken from GoogleEarth based on original publication map	Mean Sea Level / General definition	Not reported	2	NR				They interpret the overlying beach ridge to represent sea levels 5-6 m above present.	N/A							From some "backreef" corals developed beneath a strandplain deposits. "The base of the beach stratification is 3.5 to 6.5 m above present sea level." - Szabo et al., 1978	No	No	Coral heads of Montastrea sp.		Montastrea
[truncated: 64 more columns]

## Sheet: Amino Acid Racemization
WALIS AAR ID	Public	Reference(s)	IGSN	Sample ID	Analysis ID	Reported ID	Date of analysis	Laboratory name	Sample Type	Taxonomy	Sample position	Whole-Rock?	Grain Size (μm)	Carbonate (%)	Fraction (μm)	Notes and comments on sample quality	Collection Context	Depth of burial (m)	Accepted?	Reason for rejection	Reported Latitude	Reported Longitude	Latitude (decimal degrees)	Longitude (decimal degrees)	Are Lat/Long estimated?	Original elevation datum used	Elevation measurement method	Reported elevation (m)	Reported elevation uncertainty (m)	Elevation above MSL (m)	Elevation uncertainty used (m)	Elevation comments	Age is Older/Equal/Younger than	Marine Isotopic Stage	Comments/details on MIS designation	Reported age (ka)	Reported age uncertainty (±2σ) (ka)	Current Annual Mean Temperature (°C)	Preparation procedure	Method of chromatography	Stationary phase of the column	Number of replicates (samples)	Number of sample replicates (injections)	Ratio type	Pyrolysis experiment available	Level of uncertainty	Aspartic	Aspartic uncertainty	Glutamic
129	0	Mazzullo, 2006		MA06-002	MA006-002-001	KW-30A		University of Woolongong, Australia	The gastropod: Strombus gigas.	Strombus gigas		No					"unaltered samples" from a limestone. XRD revealed they were 100% aragonite	<1.2	Yes				18.0849	-87.8955	Yes	Mean Sea Level / General definition	Not reported	1.2	N	1.2	1	No details where given as to the method in which the elevation was determined and thus uncertainties are also unknown. The latitude and longitude are also estimated.	Equal to	MIS 5e	They only state "Likely O isotope stage 5e" and no absolute age.					unknown						1-sigma	0.56	0.04
130	0	Mazzullo, 2006		MA06-003	MA006-003-001	KW-30B-1		University of Woolongong, Australia	The gastropod: Strombus gigas.	Strombus gigas		No					"unaltered samples" from a limestone. XRD revealed they were 100% aragonite	<1.2	Yes				18.0849	-87.8955	Yes	Mean Sea Level / General definition	Not reported	1.2	N	1.2	1	No details where given as to the method in which the elevation was determined and thus uncertainties are also unknown. The latitude and longitude are also estimated.	Equal to	MIS 5e	They only state "Likely O isotope stage 5e" and no absolute age.					unknown						1-sigma	0.6	0.05
[truncated: 53 more columns]

[truncated: 4 more sheets: Electron Spin Resonance, Luminescence, Other age constraints, References]
