# Supplementary material for: Last interglacial sea levels within the Gulf of Mexico and northwestern Caribbean Sea
Source: Copernicus journal article supplement (doi:10.5194/essd-13-1419-2021), 2021-04-01
Supplement: Supplementary file 2 [file essd-13-1419-2021-supplement.zip]

Archive with 2 entries (2 files):
- essd-13-1419-2021-supplement-title-page.pdf
- Last interglacial sea-level proxies from the Gulf of Mexico and northwestern Carribean Sea2.xlsx
